# Supplementary material
Source: PubMed Central journal article supplement (PMC3188577)
Supplement: supp_137.10.1743_040436FigS5.pdf [file supp_137.10.1743_040436FigS5.pdf]

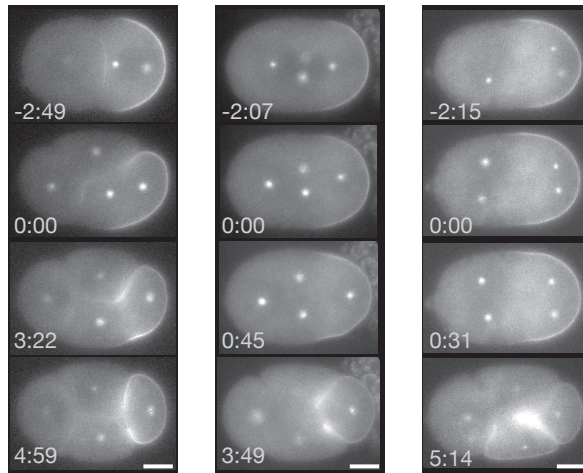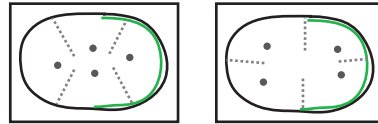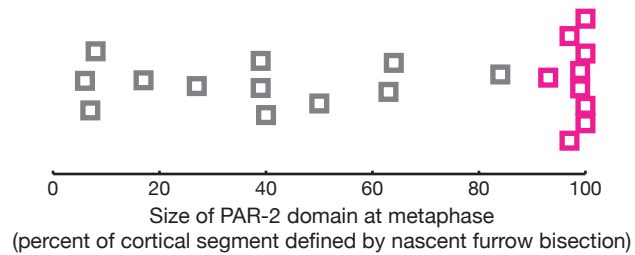

■ PAR-2 disappeared from cell cortex during cleavage    
 ■ PAR-2 occupied entire cell cortex during cleavage
