# Supplementary material
Source: PubMed Central journal article supplement (PMC3188577)

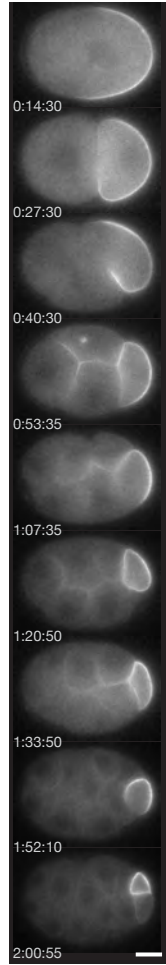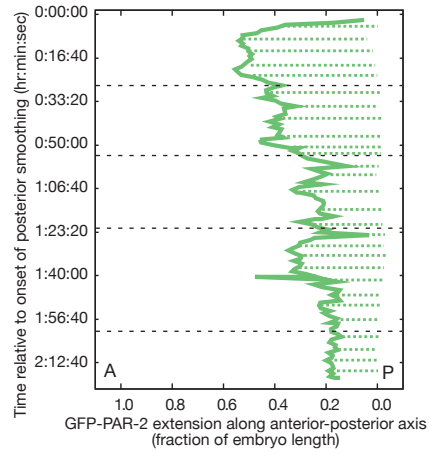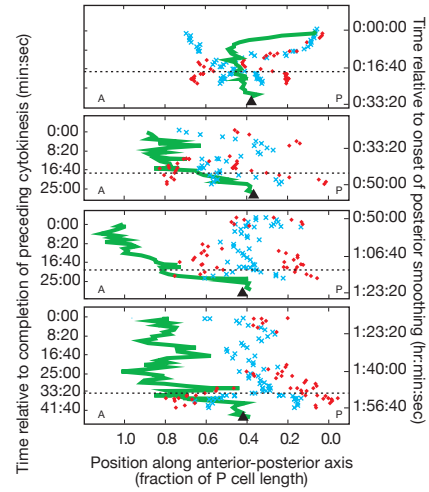

Supplement: supp_137.10.1743_040436FigS1.pdf [file supp_137.10.1743_040436FigS1.pdf]

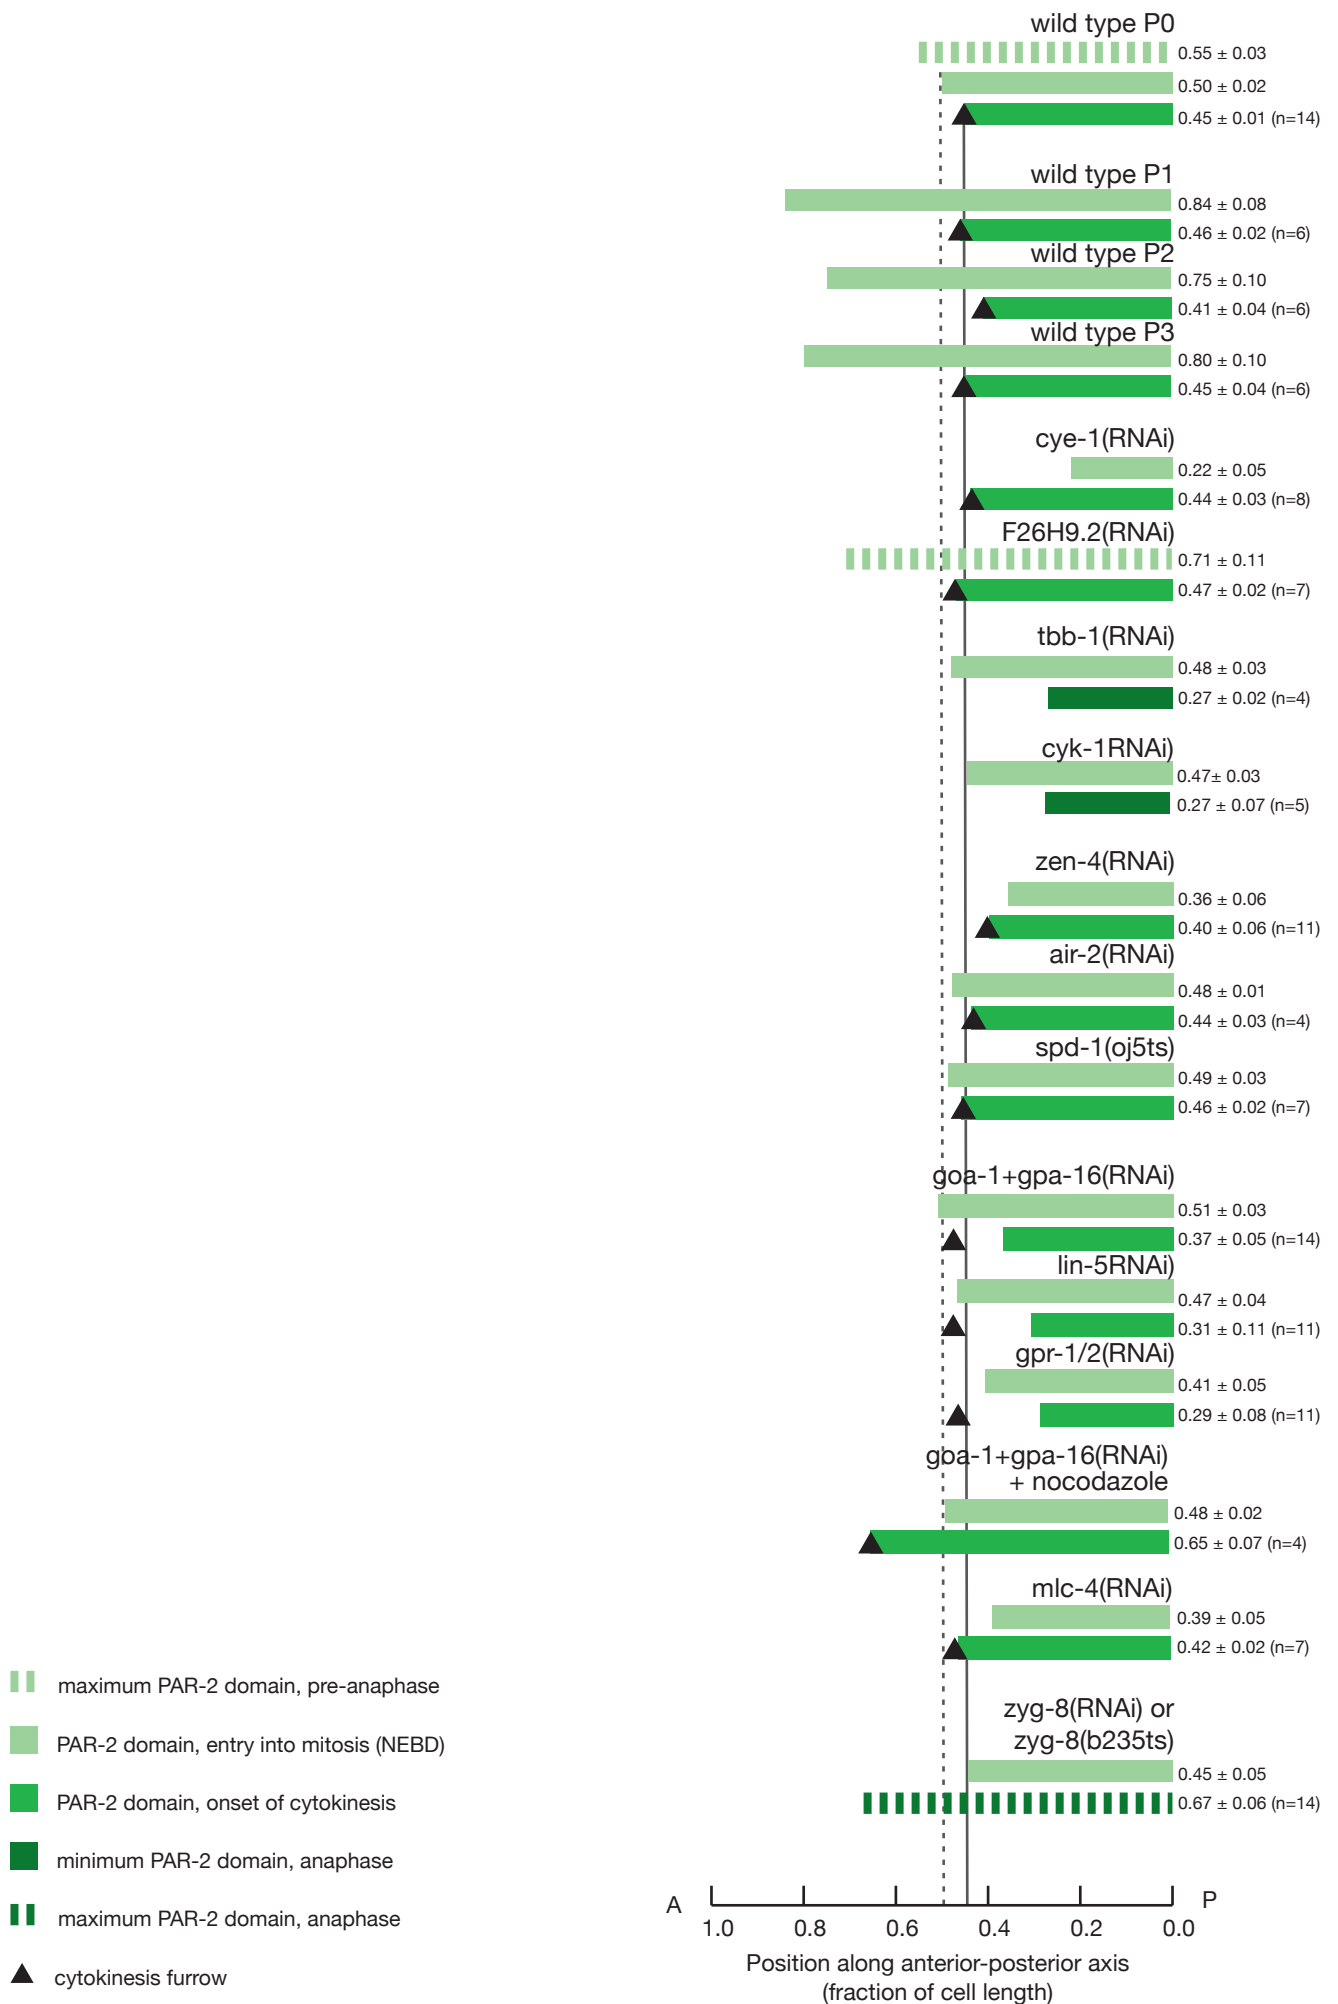

Supplement: supp_137.10.1743_040436FigS2.pdf [file supp_137.10.1743_040436FigS2.pdf]

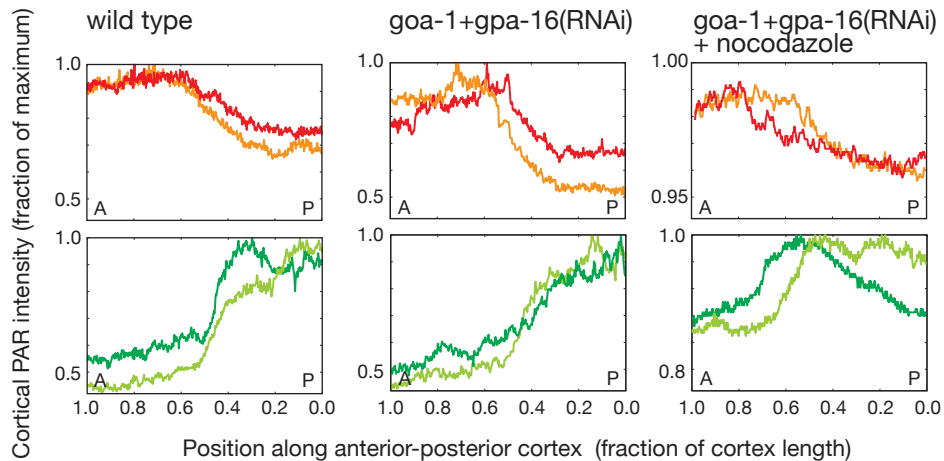

Supplement: supp_137.10.1743_040436FigS3.pdf [file supp_137.10.1743_040436FigS3.pdf]

wild type

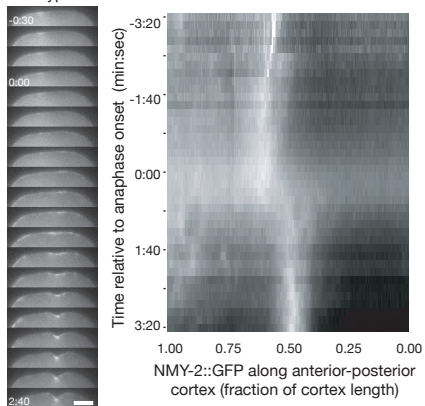

goa-1+  
gpa-16(RNAi)

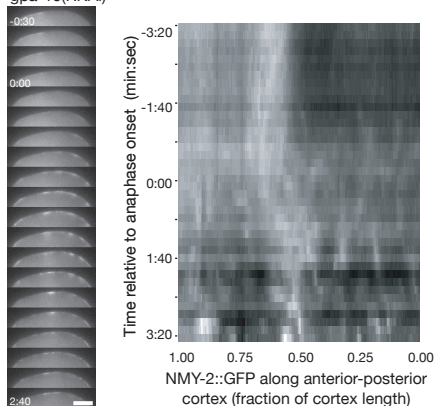

goa-1+  
gpa-16(RNAi)  
nocodazole

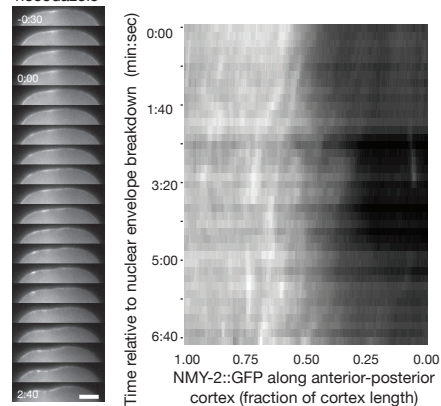

gpr-1/2(RNAi)

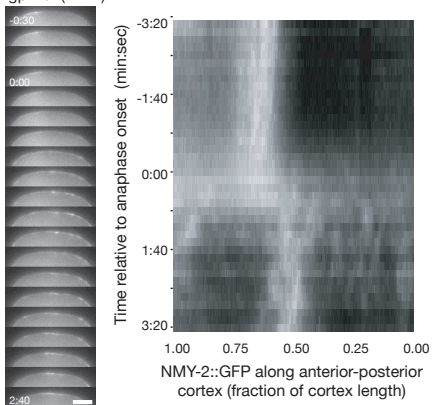

lin-5(RNAi)

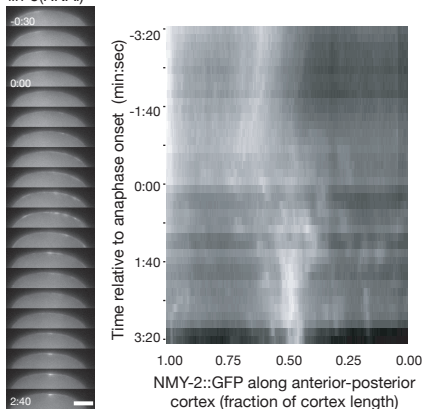

Supplement: supp_137.10.1743_040436FigS4.pdf [file supp_137.10.1743_040436FigS4.pdf]
